# Supplementary material for: Global biochemical and structural analysis of the type IV pilus from the Gram-positive bacterium Streptococcus sanguinis
Source: PubMed Central journal article supplement (PMC6497953; doi:10.1074/jbc.ra118.006917), 2019-03-05
Supplement: supp_RA118.006917_142251_2_supp_292987_pnlnny.pdf [file supp_RA118.006917_142251_2_supp_292987_pnlnny.pdf]

Global biochemical and structural analysis of the type IV pilus from the Gram-positive bacterium  
*Streptococcus sanguinis*

**Jamie-Lee Berry<sup>1</sup>, Ishwori Gurung<sup>1</sup>, Jan Haug Anonsen<sup>2,3</sup>, Ingrid Spielman<sup>4,5</sup>, Elliot Harper<sup>1</sup>, Alexander M. J. Hall<sup>1</sup>, Vivianne J. Goosens<sup>1</sup>, Claire Raynaud<sup>1</sup>, Michael Koomey<sup>3</sup>, Nicolas Biais<sup>4,5</sup>, Stephen J. Matthews<sup>6</sup>, Vladimir Pelicic<sup>1</sup>**

From the <sup>1</sup>Medical Research Council Centre for Molecular Bacteriology and Infection, Imperial College London, London, United Kingdom; <sup>2</sup>Department of Biological Sciences, Proteomics and Mass Spectrometry Unit, University of Oslo, Oslo, Norway; <sup>3</sup>Department of Biological Sciences, Center for Integrative Microbial Evolution, University of Oslo, Norway; <sup>4</sup>Department of Biology, Brooklyn College of the City University of New York, New York, USA; <sup>5</sup>The Graduate Center of the City University of New York, New York, USA; <sup>6</sup>Centre for Structural Biology, Imperial College London, London, United Kingdom

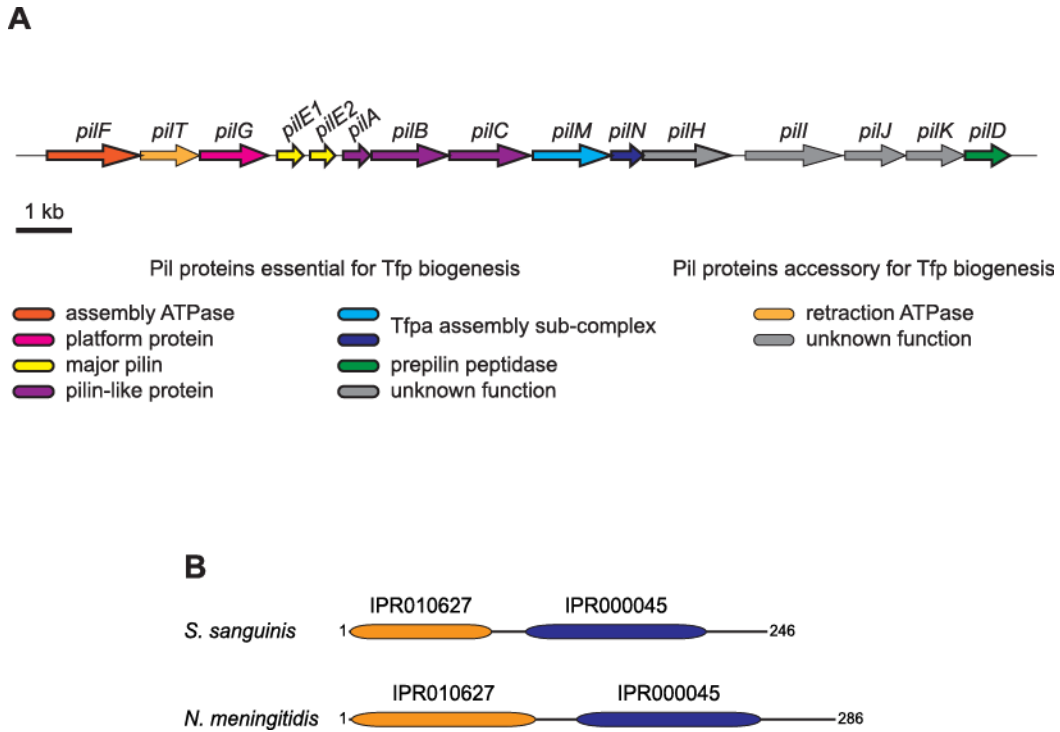

**Figure S1.** Bioinformatic analysis of the genes in the *pil* locus of *S. sanguinis* 2908 and of its prepilin peptidase PilD. **(A)** Gene organisation in the *pil* locus in *S. sanguinis* 2908. All the genes are drawn to scale and the scale bar represents 1 kb. Genes essential for Tfp biogenesis are boxed by a thick line. **(B)** Protein architecture of the prepilin peptidases in *S. sanguinis* and *N. meningitidis*. The N-terminal IPR010627 motif (orange rounded rectangle) catalyses N-methylation, while the C-terminal IPR000045 motif (blue rounded rectangle) catalyses proteolytic processing of pilins. Proteins have been drawn to scale and the subscript numbers indicate protein length.

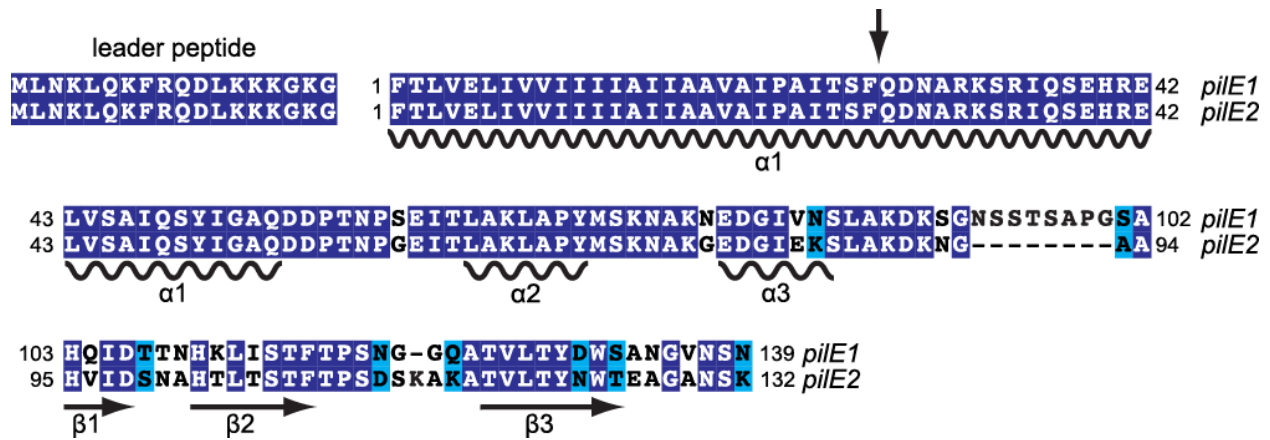

**Figure S2.** Sequence alignment of the major pilins PilE1 and PilE2 in *S. sanguinis* 2908. Residues are shaded in dark blue (identical), light blue (conserved) or unshaded (different). Structural features -  $\alpha$ -helices and  $\beta$ -strands - are indicated below the sequences. The vertical arrow indicates the N-terminal portion of PilE1 and PilE2 that was truncated to facilitate protein purification.

**Movies S1.** Cellular motility of a *ApilE1* mutant. A small chain of cells attached to a coverslip was imaged for 30 sec. The scale bar represents 5  $\mu\text{m}$ .

**Movies S2.** Cellular motility of a *ApilE2* mutant. A small chain of cells attached to a coverslip was imaged for 30 sec. The scale bar represents 5  $\mu\text{m}$ .

**Table S1.** NMR structural statistics.

---

| <b>6His-PilE1</b>                   |       |
|-------------------------------------|-------|
| Number of distance restraints       | 1,750 |
| intra-residual                      | 712   |
| sequential                          | 416   |
| medium range                        | 287   |
| long range                          | 335   |
| NOE violations >0.5 Å (%)           | 0.85  |
| Dihedral violations >5° (%)         | 0     |
| Ramachandran favoured (%)           | 84.4  |
| Ramachandran allowed (%)            | 13.5  |
| Ramachandran generously allowed (%) | 0.7   |
| Ramachandran disallowed (%)         | 1.3   |

---

Table S2. Strains and plasmids used in this study.

| Name                               | Details                                                            | Source     |
|------------------------------------|--------------------------------------------------------------------|------------|
| <b><i>E. coli</i> strains</b>      |                                                                    |            |
| DH5 $\alpha$                       | used for cloning                                                   |            |
| BL21(DE3)                          | used for protein expression and purification                       |            |
| <b><i>S. sanguinis</i> strains</b> |                                                                    |            |
| 2908                               | sequenced WT isolate                                               | (1)        |
| $\Delta pilA$                      | $\Delta pilA::aphA-3$ deletion mutant                              | (1)        |
| $\Delta pilB$                      | $\Delta pilB::aphA-3$ deletion mutant                              | (1)        |
| $\Delta pilC$                      | $\Delta pilC::aphA-3$ deletion mutant                              | (1)        |
| $\Delta pilD$                      | $\Delta pilD::aphA-3$ deletion mutant                              | (1)        |
| $\Delta pile1$                     | $\Delta pile1::aphA-3$ deletion mutant                             | (1)        |
| $\Delta pile1$ primary mutant      | $\Delta pile1::pheS*aphA-3$ deletion mutant                        | (2)        |
| $pile1_{G-1A}$                     | $pile1$ point mutant expressing Pile1 <sub>G-1A</sub>              | this study |
| $pile1_{G-1S}$                     | $pile1$ point mutant expressing Pile1 <sub>G-1S</sub>              | this study |
| $pile1_{E5A}$                      | $pile1$ point mutant expressing Pile1 <sub>E5A</sub>               | this study |
| $pile1_{6His-short}$               | $pile1$ point mutant expressing 6His-tagged Pile1 <sub>short</sub> | this study |
| $pile1_{6His-long}$                | $pile1$ point mutant expressing 6His-tagged Pile1 <sub>long</sub>  | (2)        |
| $\Delta pilE2$                     | $\Delta pilE2::aphA-3$ deletion mutant                             | (1)        |
| $\Delta pilE2$ primary mutant      | $\Delta pilE2::pheS*aphA-3$ deletion mutant                        | this study |
| $pile2_{6His-short}$               | $pile2$ point mutant expressing 6His-tagged Pile2 <sub>short</sub> | this study |
| $pile2_{6His-long}$                | $pile2$ point mutant expressing 6His-tagged Pile2 <sub>long</sub>  | this study |
| $\Delta pile1\Delta pilE2$         | $\Delta pile1\Delta pilE2::aphA-3$ double deletion mutant          | (1)        |
| $\Delta pilT$                      | $\Delta pilT::aphA-3$ deletion mutant                              | (1)        |
| <b>Plasmids</b>                    |                                                                    |            |
| pCR8/GW/TOPO                       | TA cloning vector                                                  | Invitrogen |
| TOPO- $pheS*aphA-3$                | $pheS*aphA-3$ double cassette in pCR8/GW/TOPO                      | (2)        |
| TOPO- $pile1$                      | full-length $pile1$ in pCR8/GW/TOPO                                | this study |
| TOPO- $pile1_{G-1A}$               | $pile1_{G-1A}$ in pCR8/GW/TOPO                                     | this study |
| TOPO- $pile1_{G-1S}$               | $pile1_{G-1S}$ in pCR8/GW/TOPO                                     | this study |
| TOPO- $pile1_{E5A}$                | $pile1_{E5A}$ in pCR8/GW/TOPO                                      | this study |
| pMK- $pilB$                        | codon-optimised $pilB$ in pMK                                      | GeneArt    |
| pMK-RQ- $pilC$                     | codon-optimised $pilC$ in pMK-RQ                                   | GeneArt    |
| pET-28b                            | T7-based expression vector                                         | Novagen    |
| pET28- $pilA$                      | pET-28b derivative for expressing 6His-PilA <sub>33-164</sub>      | this study |
| pET28- $pilB$                      | pET-28b derivative for expressing 6His-PilB <sub>37-462</sub>      | this study |
| pET28- $pilC$                      | pET-28b derivative for expressing 6His-PilC <sub>34-486</sub>      | this study |
| pET28- $pile1$                     | pET-28b derivative for expressing 6His-Pile1 <sub>46-157</sub>     | this study |
| pET28- $pile2$                     | pET-28b derivative for expressing 6His-Pile2 <sub>46-150</sub>     | this study |

Table S3. Primers used in this study.

| Name                                           | Sequence                                                                   |
|------------------------------------------------|----------------------------------------------------------------------------|
| <b>Cloning in pET-28b</b>                      |                                                                            |
| <i>pilA</i> -pETF                              | <u>ggg</u> <u>ccatgg</u> atcatcatcatcatcatcatGATACAGGGCAAAGCCAGAC          |
| <i>pilA</i> -pETR                              | <u>cccgtcgac</u> TTACTTCTGTGCCGATCTCAA                                     |
| <i>pilB</i> -pETF                              | <u>ggg</u> <u>ccatgg</u> atcatcatcatcatcatcatcatAGCAGCCGTGAACTGATTGA       |
| <i>pilB</i> -pETR                              | <u>cccggatcc</u> TTACGGACCGCTAACAAACC                                      |
| <i>pilC</i> -pETF                              | <u>ggg</u> <u>ccatgg</u> atcatcatcatcatcatcatcatAATAACATTCTGCGTCAGCGTAGCCA |
| <i>pilC</i> -pETR                              | <u>cccggatcc</u> TTAGCTTGCTTTGTATTTATCGC                                   |
| <i>pilE1</i> -pETF                             | <u>gg</u> <u>ccatgg</u> atcatcatcatcatcatcatcatCAAGATAACGCTCGTAAGAGCC      |
| <i>pilE1</i> -pETR                             | <u>ccggatcc</u> TTAGTTTGAGTTTACACCATTAGCAGA                                |
| <i>pilE2</i> -pETF                             | <u>gg</u> <u>ccatgg</u> atcatcatcatcatcatcatcatCAAGATAACGCTCGTAAGAGCC      |
| <i>pilE2</i> -pETR                             | <u>cccggatcc</u> TTATTTTGAATTAGCACCAGCTTCG                                 |
| <b>Cloning in pCR8/GW/TOPO</b>                 |                                                                            |
| <i>pilE1</i> -F                                | AGGAACAAAACAAATGCCCT                                                       |
| <i>pilE1</i> -R                                | TCTCAAATGCAGGGTTTTACTACA                                                   |
| <b>Site-directed mutagenesis</b>               |                                                                            |
| <i>pilE1</i> <sub>G-1A</sub> #1                | GACTTGAAGAAAAAAGGTAAAG <b>C</b> TTTTACCTTGGTTGAGTTGATC                     |
| <i>pilE1</i> <sub>G-1A</sub> #2                | GATCAACTCAACCAAGGTAAAAG <b>G</b> TTTTACCTTTTTTCTTCAAGTC                    |
| <i>pilE1</i> <sub>G-1S</sub> #1                | GACTTGAAGAAAAAAGGTAAA <b>A</b> GTTTTACCTTGGTTGAGTTGATC                     |
| <i>pilE1</i> <sub>G-1S</sub> #2                | GATCAACTCAACCAAGGTAAA <b>A</b> CTTTTACCTTTTTTCTTCAAGTC                     |
| <i>pilE1</i> <sub>E5A</sub> #1                 | GTAAAGGTTTTACCTTGGTT <b>G</b> CGTTGATCGTGGAATTATC                          |
| <i>pilE1</i> <sub>E5A</sub> #2                 | GATAATTACCACGATCAAC <b>G</b> CAACCAAGGTAAAACCTTTAC                         |
| <b>Engineering <i>S. sanguinis</i> mutants</b> |                                                                            |
| <i>pheS</i> -F                                 | ATGACGAAAACGATTGAAGAAC                                                     |
| <i>aph</i> -R                                  | CTAAAACAATTCATCCAGTAAAA                                                    |
| <i>pilE1</i> -F1                               | CAGGCCGGTGAAAAGACTG                                                        |
| <i>pilE1</i> -R1                               | GTTCTTCAATCGTTTTTCGTCATTTTGAATAGATCTCCTGTTTTT                              |
| <i>pilE1</i> -F2                               | TTTTACTGGATGAATTGTTTTAGCGACTGGTCTGCTAATGGTG                                |
| <i>pilE1</i> -R2                               | GCTCTGTTGAAGGATCCACG                                                       |
| <i>pilE1</i> -R3                               | TTAGTGATGGTGATGGTGATGGTTTTGAGTTTACACCATTAGCAG                              |
| <i>pilE1</i> -F3                               | CATCACCATCACCATCACTAATTGTCAAATCATCTAAATAAGATGTA                            |
| <i>pilE1</i> -R4                               | TTAGTGATGGTGATGGTGATGAGACCAGTCGTAGGTCAAAAC                                 |
| <i>pilE1</i> -F4                               | CATCACCATCACCATCACTAATTGTCAAATCATCTAAATAAGATGTA                            |
| <i>pilE1</i> -R5                               | AGGGGCATTTGTTTTGTTCTT                                                      |
| <i>pilE1</i> -F5                               | TGTAGTAAAACCTGCATTTGAGA                                                    |
| <i>pilE2</i> -F1                               | GGAACGTCTGACAGGGATGA                                                       |
| <i>pilE2</i> -R1                               | GTTCTTCAATCGTTTTTCGTCATATGTATTTTCTCCTAATGTTTTTATG                          |
| <i>pilE2</i> -F2                               | TTTTACTGGATGAATTGTTTTAGACCGAAGCTGGTGCTAATTC                                |
| <i>pilE2</i> -R2                               | TACCATCCGCAGAAAGACCA                                                       |
| <i>pilE2</i> -R3                               | TTAGTGATGGTGATGGTGATGTTTTGAATTAGCACCAGCTTC                                 |
| <i>pilE2</i> -F3                               | CATCACCATCACCATCACTAATAACTTGAATTAATTTGAGTTATTCAT                           |
| <i>pilE2</i> -R4                               | TTAGTGATGGTGATGGTGATGGGTCCAGTTGTATGTTAAAACG                                |
| <i>pilE2</i> -F4                               | CATCACCATCACCATCACTAATAACTTGAATTAATTTGAGTTATTCAT                           |

Overhangs are in lower case, with restriction sites underlined. Mismatched bases generating point mutations are in bold upper case.



## References

1. Gurung, I., Spielman, I., Davies, M. R., Lala, R., Gaustad, P., Biais, N., and Pelicic, V. (2016) Functional analysis of an unusual type IV pilus in the Gram-positive *Streptococcus sanguinis*. *Mol. Microbiol.* **99**, 380-392
2. Gurung, I., Berry, J. L., Hall, A. M. J., and Pelicic, V. (2017) Cloning-independent markerless gene editing in *Streptococcus sanguinis*: novel insights in type IV pilus biology. *Nuc. Acids Res.* **45**, e40
